# Supplementary material for: A TNF-induced gene expression program under oscillatory NF-κB control
Source: PubMed Central journal article supplement (PMC1262712; doi:10.1186/1471-2164-6-137), 2005-09-28
Supplement: 1471-2164-6-137-S2.pdf [file 1471-2164-6-137-S2.pdf]

**Table 2. Early gene NF- $\kappa$ B prediction and human-mouse promoter mapping.**

| Table II: E   |      |                     | Human          |       |                  | Mouse |                   |                |            |                  |            |
|---------------|------|---------------------|----------------|-------|------------------|-------|-------------------|----------------|------------|------------------|------------|
| Promoter      | Chr. | Location (bp)       | NF- $\kappa$ B | MM    | Sequence         | Chr.  | Location (bp)     | NF- $\kappa$ B | MM         | Sequence         |            |
| <b>A20</b>    | 6    | 138229274-138234057 | 161 (-)        | 0.828 | cgggtgTCCCTggga  | 10    | 18710180-18714780 | 542 (+)        | 0.803      | ggcttGGAGAaccctg |            |
|               |      |                     | 260 (-)        | 0.851 | GAAATgcccg       |       |                   | 813 (+)        | 0.807      | gcttcCGAAAtgccca |            |
|               |      |                     | 536 (+)        | 0.828 | cacgcGGGGAaccccc |       |                   | 836 (+)        | 0.828      | cacgcGGGGAaccccc |            |
|               |      |                     | 747 (-)        | 0.966 | tggaaaGTCCCGt    |       |                   | 943 (-)        | 0.96       | GGAAATtcca       |            |
|               |      |                     | 761 (-)        | 1     | GGAAAtcccc       |       |                   | 955 (-)        | 1          | GGAAAtcccc       |            |
|               |      |                     | 1017 (-)       | 0.868 | tgggacTTTGCGaaag |       |                   |                | 1000 (-)   | 0.949            | GGAACTgccc |
| <b>CCL-20</b> | 2    | 228503075-228504132 | 633 (-)        | 0.851 | GGAATgttcc       | 1     | 83641204-83642245 | 57 (+)         | 0.878      | ggtgtTTTCC       |            |
|               |      |                     | 780 (-)        | 0.85  | caggatTCTCCccttc |       |                   | 900 (+)        | 0.954      | atgggGGAAAcaccog |            |
|               |      |                     | 905 (+)        | 0.954 | aatggGGAAAcoccca |       |                   |                |            |                  |            |
| <b>CXCL-1</b> | 4    | 75099144-75100222   | 922 (-)        | 1     | cgggaaTTTCCctggc | 5     | 89705281-89706230 | 246 (+)        | 0.977      | tggacTTTCC       |            |
|               |      |                     | 948 (+)        | 0.99  | cgggcTTTCC       |       |                   | 328 (+)        | 0.84       | cttccGGAAAgttccc |            |
|               |      |                     |                |       |                  |       |                   | 847 (-)        | 0.981      | GGAAAcaccc       |            |
|               |      |                     |                |       |                  |       |                   | 865 (+)        | 1          | gggaaTTTCC       |            |
|               |      |                     |                |       |                  |       |                   | 888 (-)        | 0.806      | ctggagTTTCGagcat |            |
| <b>CXCL-2</b> | 4    | 75329873-75330927   | 911 (-)        | 1     | cgggaaTTTCCctggc | "     | "                 |                |            |                  |            |
|               |      |                     | 936 (+)        | 0.99  | cgggcTTTCC       |       |                   |                |            |                  |            |
| <b>CXCL-3</b> | 4    | 75269364-75270440   | 190 (-)        | 0.946 | GGAAGttcca       | "     | "                 |                |            |                  |            |
|               |      |                     | 920 (-)        | 1     | cgggaaTTTCCctggc |       |                   |                |            |                  |            |
|               |      |                     | 946 (+)        | 0.99  | cgggcTTTCC       |       |                   |                |            |                  |            |
| <b>IL-8</b>   | 4    | 74970371-74971410   | 859 (+)        | 0.978 | tggaaTTTCC       | "     | "                 |                |            |                  |            |
| <b>IL-6</b>   | 7    | 22539060-22540121   | 241 (+)        | 0.86  | ggaggATTCC       | 5     | 28412048-28413078 | 909 (-)        | 0.998      | tgggatTTTCCcatga |            |
|               |      |                     | 926 (-)        | 0.998 | tgggatTTTCCcatga |       |                   |                |            |                  |            |
| <b>TNF</b>    | 6    | 31650341-31651497   | 379 (-)        | 0.865 | cggggcTGTCcaggc  | 17    | 33697337-33698492 | 128 (+)        | 0.818      | ggggaGGGGAatcctt |            |
|               |      |                     |                |       |                  |       |                   | 250 (-)        | 0.866      | GGAAActca        |            |
|               |      |                     |                |       |                  |       |                   | 330 (+)        | 0.852      | cgtaATTCC        |            |
|               |      |                     |                |       |                  |       |                   | 361 (-)        | 0.842      | tggggcTGCCcatac  |            |
|               |      |                     |                |       |                  |       |                   | 478 (+)        | 1          | ggggcTTTCC       |            |
|               |      |                     |                |       |                  |       | 777 (+)           | 0.947          | aggagATTCC |                  |            |

TABLE II, contd

|         |       |                     |         |       |                     |         |                     |                 |       |                  |
|---------|-------|---------------------|---------|-------|---------------------|---------|---------------------|-----------------|-------|------------------|
| IkBa    | 14    | 34943602-34944703   | 556 (+) | 0.802 | aaaacGGAAAggacog    | 12      | 50679716-50680769   | 304 (-)         | 0.868 | aggggTCTCCaagct  |
|         |       |                     | 574 (+) | 0.894 | aggttGCAAaaccoca    |         |                     | 554 (+)         | 0.802 | aaaccGGAAAgacct  |
|         |       |                     | 661 (-) | 0.948 | gggaaACCCC          |         |                     | 656 (+)         | 0.927 | coggtGGGAAaccoca |
|         |       |                     | 724 (-) | 0.942 | GGAAgTaccg          |         |                     | 723 (-)         | 0.927 | GGAAgTacc        |
|         |       |                     | 755 (+) | 0.965 | aggacTTTCC          |         |                     | 755 (+)         | 0.965 | aggacTTTCC       |
|         |       |                     | 820 (-) | 0.874 | agggagTTTCTccgat    |         |                     | 820 (-)         | 0.874 | agggagTTTCTccgat |
|         |       |                     | 915 (-) | 0.997 | ttggaaaTTCCcog      |         |                     | 905 (-)         | 1     | GGAAAtccc        |
|         |       |                     | 942 (+) | 0.831 | cccagAGAAAtccoca    |         |                     | 930 (+)         | 0.831 | cccagAGAAAtccoct |
|         |       |                     | IRF     | 4     | 131853070-131855326 |         |                     | 68 (+)          | 0.895 | gccagGGGGAgtccca |
| 302 (+) | 0.988 | tggaTTTCC           |         |       |                     | 318 (-) | 0.852               | aaggtgTTCCccatc |       |                  |
| 400 (-) | 0.819 | agggggTCACCcctaa    |         |       |                     | 419 (+) | 0.956               | tggaGTTCC       |       |                  |
| 536 (+) | 0.819 | gcccgGGCGAtccoct    |         |       |                     | 632 (+) | 0.857               | agaagGGGAAgacat |       |                  |
| 913 (+) | 0.925 | GGGGAatccc          |         |       |                     | 924 (+) | 0.931               | GGGGAatccc      |       |                  |
| PTGS2   | 1     | 183381080-183382213 | 552 (+) | 0.957 | aggggATTCC          | 1       | 150029778-150030877 | 727 (+)         | 0.921 | cagctGGAAAtccgt  |
|         |       |                     | 777 (-) | 0.881 | ggggacTACCcctct     |         |                     |                 |       |                  |
|         |       |                     |         |       |                     |         |                     |                 |       |                  |
| c-Rel   | 2     | 61019451-61020626   | 415 (-) | 0.926 | GGAAcCacct          | 11      | 23666257-23667537   | 478 (+)         | 0.935 | tgccgCTTCC       |
|         |       |                     | 859 (+) | 0.999 | ccgogGGAAAtccoc     |         |                     | 565 (-)         | 0.941 | GGAAcCacog       |
|         |       |                     |         |       |                     |         |                     | 714 (-)         | 0.831 | gggggaTTTCTcaggg |
| PLAU    | 10    | 75339896-75341319   | 226 (-) | 0.938 | GGAAgCacca          | 14      | 17121003-17122374   | 727 (+)         | 0.921 | cagctGGAAAtccgt  |
|         |       |                     | 358 (-) | 0.814 | ctggccTTGCCttcc     |         |                     | 911 (-)         | 1     | GGAAAtccc        |
|         |       |                     | 509 (+) | 0.877 | ggggTTTTTC          |         |                     |                 |       |                  |

**Table 2. Early gene NF- $\kappa$ B prediction and human-mouse promoter mapping.** The human genes for Early and Late group were mapped to their mouse homologs using the Human Genome Browser gateway using the Human May 2004 (hg17) assembly (NCBI Build 35 produced by the International Human Genome Sequencing Consortium, located on the UCSC Genome Bioinformatics Site, <http://genome.ucsc.edu/index.html>) and the Mouse (Mus musculus) assembly (Build 33 by the NCBI). For each gene, -1 kb upstream and the first noncoding exon were analyzed. Sequences were analyzed by matrix similarity scores in TRANSFAC using V\$CREL\_01, V\$NFkB\_Q6, V\$NFkB\_C, V\$NFKAPPAB\_01, V\$NFKAPPAB50\_01, and V\$NFKAPPAB65\_01. Significant matches were identified by filtering matrix scores by minimizing the sum the false positive and negative error rates. For multiple matches on the same sequence, the matrix scores (MM) were ranked, and the highest matrix score was selected. Abbreviations used are: Chr., chromosome, NF- $\kappa$ B, location in nucleotides of NF- $\kappa$ B sequence; +/-, sequence located on plus strand or minus strand, respectively; Sequence, is nucleotide sequence of the predicted binding site.
