# Supplementary material for: A TNF-induced gene expression program under oscillatory NF-κB control
Source: PubMed Central journal article supplement (PMC1262712; doi:10.1186/1471-2164-6-137), 2005-09-28
Supplement: 1471-2164-6-137-S3.pdf [file 1471-2164-6-137-S3.pdf]

**Table III. Late gene NF- $\kappa$ B prediction and human-mouse promoter mapping.**

| Late Promoter | Human |                     |         |       | Mouse             |       |                     |         |                   |                 |       |                  |
|---------------|-------|---------------------|---------|-------|-------------------|-------|---------------------|---------|-------------------|-----------------|-------|------------------|
|               | Chr.  | Location (bp)       | NFKB    | MM    | Sequence          | Chr.  | Location (bp)       | NFKB    | MM                | Sequence        |       |                  |
| <b>Cyb5</b>   | 18    | 70110091-70111159   | 129 (-) | 0.871 | gtggaTTCCtctgt    | 18    | 85362396-85363465   | 497 (-) | 0.869             | GGAAAccaag      |       |                  |
|               |       |                     | 568 (+) | 0.988 | caataGGAAActcccg  |       |                     | 982 (-) | 0.972             | GGAAAtgccc      |       |                  |
|               |       |                     | 963 (-) | 0.861 | gtggggTTCCGggcgc  |       |                     |         |                   |                 |       |                  |
|               |       |                     | 981 (-) | 0.972 | GGAAAtgccc        |       |                     |         |                   |                 |       |                  |
| <b>ECE1</b>   | 1     | 21362214-21363213   | 100 (-) | 0.856 | caggggATCCGcctt   | 4     | 136319312-136363170 | NF      | NA                | NA              |       |                  |
| <b>ICAM1</b>  | 19    | 10241779-10242835   | 859 (-) | 0.829 | ggggtcTCCCgggag   | 9     | 20941067-20942141   | 174 (-) | 0.999             | GGAAAccccc      |       |                  |
|               |       |                     | 518 (+) | 0.86  | ggaggATTCC        |       |                     | 431 (-) | 0.808             | caggacTTCTcacag |       |                  |
|               |       |                     | 832 (-) | 0.986 | GGAAAttccg        |       |                     | 828 (-) | 0.977             | GGAAAttcct      |       |                  |
|               |       |                     | 937 (+) | 0.869 | cgaggTTTCC        |       |                     | 933 (+) | 0.869             | cgaggTTTCC      |       |                  |
| <b>IL27RA</b> | 19    | 14002560-14003684   | 138 (+) | 0.968 | tggccTTTCC        | NF    | NA                  | NA      | NA                |                 |       |                  |
| <b>KLRC2</b>  | 12    | 10479853-10480897   | NF      | NA    | NA                | 6     | 130353839-130354838 | NF      | NA                | NA              |       |                  |
|               |       |                     | 150 (+) | 0.885 | gtctaGGAAAtcccag  | 11    | 54580586-54603649   | 268 (+) | 0.955             | tgggtCTTCC      |       |                  |
| <b>NAF-1</b>  | 5     | 150424850-150441744 | 218 (-) | 0.881 | ctggatTTGCCcaccc  | 11    |                     | 588 (+) | 0.879             | ggagaTTTCC      |       |                  |
|               |       |                     | 452 (+) | 0.86  | gggtcTTTTC        |       |                     | 615 (-) | 0.981             | GGAAAccccc      |       |                  |
|               |       |                     | 497 (-) | 0.814 | ctggagTGCCctggac  |       |                     | 913 (+) | 0.983             | ggggaATTCC      |       |                  |
|               |       |                     | 570 (-) | 0.919 | ttggcagGTCCct     |       |                     |         |                   |                 |       |                  |
|               |       |                     | 765 (+) | 0.844 | tagagGGAAAgcgcgc  |       |                     |         |                   |                 |       |                  |
|               |       |                     | 914 (-) | 0.998 | ggggacTTTCCcaggg  |       |                     |         |                   |                 |       |                  |
|               |       |                     | 953 (+) | 0.94  | cggaCTTCC         |       |                     |         |                   |                 |       |                  |
|               |       |                     | 60 (+)  | 0.828 | cgtggTGAAAcccccca |       |                     | 19      | 45645210-45646595 | 80 (+)          | 0.973 | cggaATTCC        |
|               |       |                     | 616 (+) | 0.991 | GGGGAAtccc        |       |                     |         |                   | 109 (+)         | 1     | ggggcTTTCC       |
|               |       |                     | 675 (-) | 0.957 | GGAAActccc        |       |                     |         |                   | 715 (+)         | 0.931 | gagggGGAAActcctc |
| 898 (-)       | 0.977 | tgggaaTTCCcctc      |         |       | 793 (-)           | 0.95  | GGAAGaacc           |         |                   |                 |       |                  |
| 928 (+)       | 1     | ggggcTTTCC          |         |       | 842 (-)           | 0.972 | GGAAAtgccc          |         |                   |                 |       |                  |
|               |       |                     |         |       | 890 (+)           | 0.863 | ctggcTGAAAtccca     |         |                   |                 |       |                  |
|               |       |                     |         |       | 989 (-)           | 0.923 | GGAAActcct          |         |                   |                 |       |                  |
|               |       |                     |         |       | 1088 (+)          | 0.992 | GGGACTtcc           |         |                   |                 |       |                  |

Table III, con't

|               |    |                     |          |       |                 |    |                     |         |       |                 |
|---------------|----|---------------------|----------|-------|-----------------|----|---------------------|---------|-------|-----------------|
| <b>NK4</b>    | 16 | 3054660-3055813     | 142 (+)  | 0.939 | tggtacttcc      | NF | NA                  | NA      | NA    | NA              |
|               |    |                     | 645 (+)  | 0.947 | caGGGAGtttcccc  |    |                     |         |       |                 |
|               |    |                     | 677 (+)  | 0.977 | tggactttcc      |    |                     |         |       |                 |
| <b>PTGES</b>  | 9  | 129594846-129595898 | 375 (-)  | 0.948 | GGAAggcc        | 2  | 30863242-30864320   | 199 (-) | 0.936 | GGAAggcca       |
|               |    |                     | 459 (-)  | 0.868 | GAAAgtccc       |    |                     |         |       |                 |
|               |    |                     | 799 (-)  | 0.867 | gaggatTGCctggaa |    |                     |         |       |                 |
|               |    |                     | 985 (+)  | 0.866 | tggtctttcc      |    |                     |         |       |                 |
| <b>TAP1</b>   | 6  | 32929572-32930601   | 583 (-)  | 0.962 | ggtaaGTCCC      | NF | NA                  | NA      | NA    | NA              |
| <b>TRAF1</b>  | 9  | 120765569-120769727 | 1328 (+) | 1     | ggggaTTTCC      | 2  | 34918072-34922576   | 280 (+) | 0.844 | tacacGGAAgacctt |
|               |    |                     | 1385 (+) | 0.965 | gggtattcc       |    |                     |         |       |                 |
|               |    |                     | 1743 (+) | 0.852 | cagagGGAAgacctc |    |                     |         |       |                 |
| <b>TRAF3</b>  | 14 | 102312569-102406291 | 255 (-)  | 0.86  | GGAAgtgcc       | 12 | 105963380-105982148 | NF      | NA    | 1181 (-)        |
|               |    |                     | 938 (+)  | 1     | ggggaTTTCC      |    |                     |         |       |                 |
|               |    |                     | 959 (-)  | 0.924 | GGAAgtgct       |    |                     |         |       |                 |
|               |    |                     | 1050 (+) | 0.996 | cGGGACTttcca    |    |                     |         |       |                 |
| <b>TRIM16</b> | 17 | 18544451-18545450   | NF       | NA    | NA              | 11 | 62432053-62433052   | 659 (-) | 0.923 | GGAAgacct       |

**Table III. Late gene NF- $\kappa$ B prediction and human-mouse promoter mapping.** Same as in Table II for the Late gene promoters.
